# Supplementary material for: Intrinsic quantum spin Hall and anomalous Hall effects in h-Sb/Bi epitaxial growth on a ferromagnetic MnO2thin film
Source: Royal Society of Chemistry journal article supplement (doi:10.1039/c6nr01949h), 2016-01-01
Supplement: c6nr01949h1.pdf [file c6nr01949h1.pdf]

## Electronic Supplementary Information

### Intrinsic Quantum Spin Hall and Anomalous Hall Effect in *h*-Sb/Bi Epitaxial Growth on Ferromagnetic MnO<sub>2</sub> Monolayer

J. Zhou,<sup>a,\*</sup> Q. Sun,<sup>b,c,a</sup> Q. Wang,<sup>c,b,a</sup> Y. Kawazoe<sup>d,e</sup>, P. Jena<sup>a,\*</sup>

<sup>a</sup> Department of Physics, Virginia Commonwealth University, Richmond, VA 23284, United States

<sup>b</sup> Department of Materials Science and Engineering, College of Engineering, Peking University, Beijing 100871, China

<sup>c</sup> Center for Applied Physics and Technology, College of Engineering, Peking University, Beijing 100871, China

<sup>d</sup> New Industry Creation Hatchery Center, Tohoku University, Sendai 980-8579, Japan

<sup>e</sup> Kutateladze Institute of Thermophysics, Siberian Branch of Russian Academy of Sciences, 630090 Novosibirsk, Russia

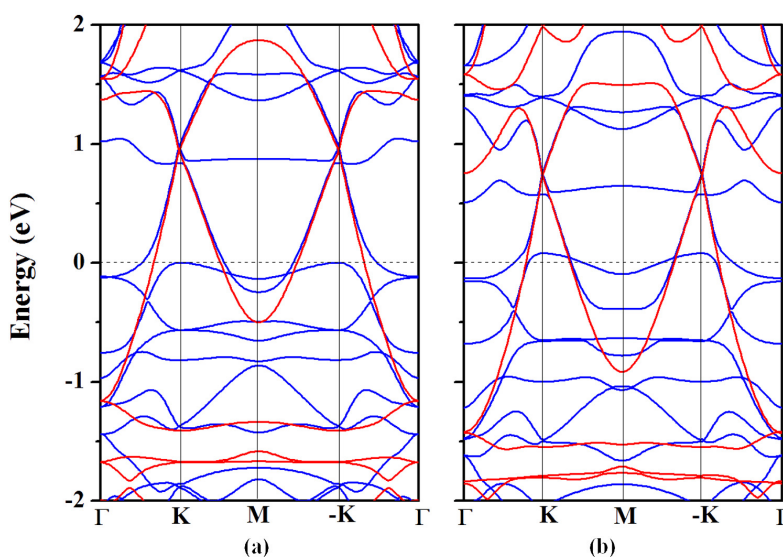

**Figure S1.** Spin polarized band structure of (a) *h*-Sb@MnO<sub>2</sub> and (b) *h*-Bi@MnO<sub>2</sub> with blue and red colors representing spin up and spin down channels, respectively. The Fermi level is shifted to 0 eV. One clearly sees that Dirac points at the K (–K) decrease from 0.96 and 0.74 eV, respectively.

\* [jzhou2@vcu.edu](mailto:jzhou2@vcu.edu); [pjena@vcu.edu](mailto:pjena@vcu.edu)

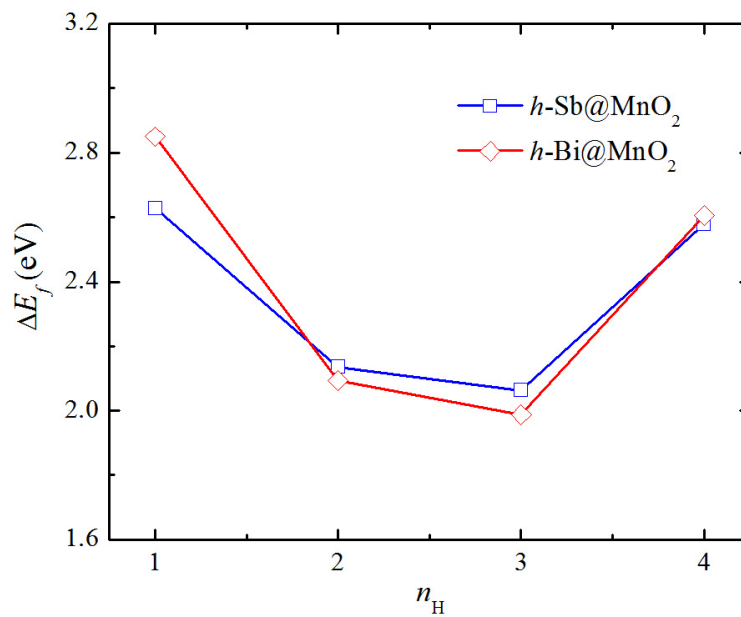

**Figure S2.** Variation of formation energy (see main text) with respect to absorbing H atoms.

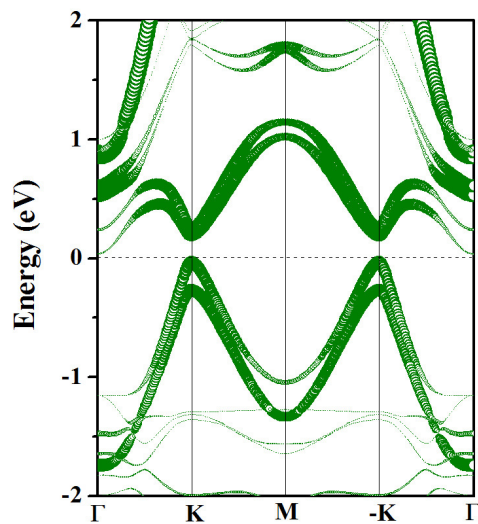

**Figure S3.** Band structure (with SOC) of  $h\text{-Sb@MnO}_2\text{-4H}$  with circle size denoting  $\text{Sb-}p_x, p_y$  contribution.

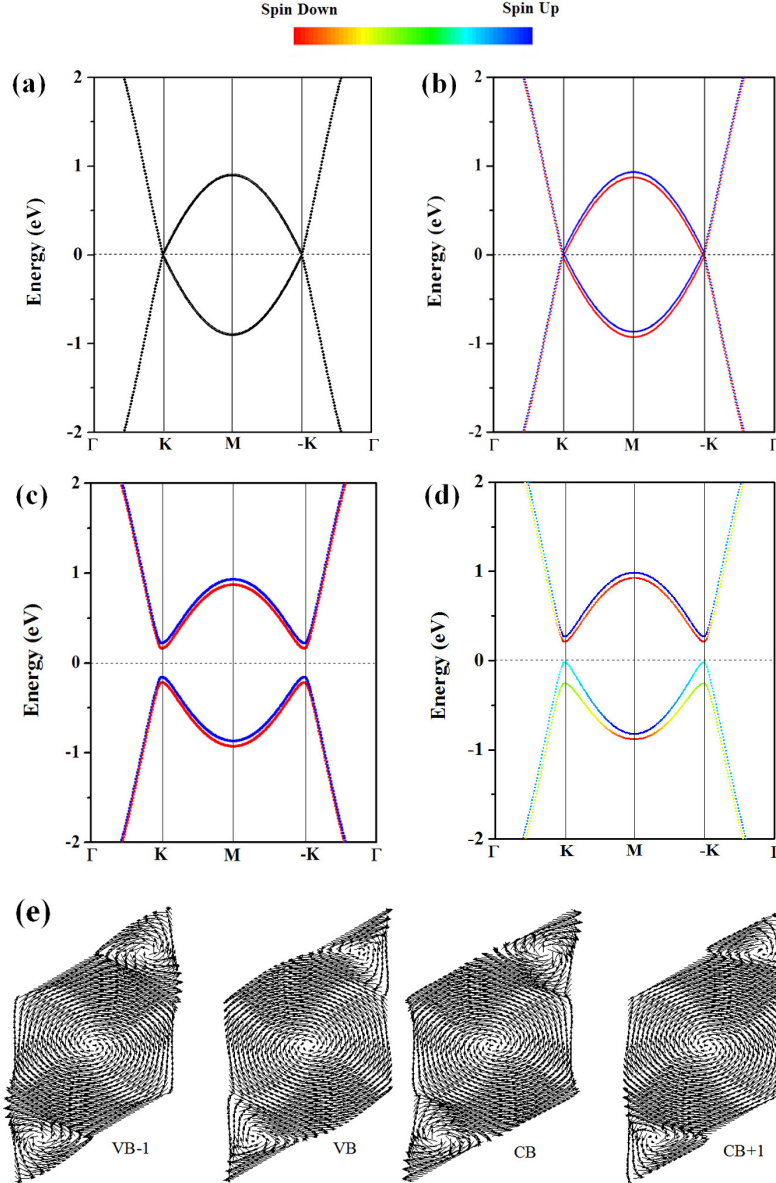

**Figure S4.** Band structure calculated using the tight binding model (see main text for the Hamiltonian). (a) Only hopping integral.  $t = 0.91$  eV,  $M_{\text{ex}} = \lambda_{\text{in}} = \lambda_{\text{R}} = 0$ . (b) Hopping integral and magnetic exchange.  $t = 0.91$  eV,  $M_{\text{ex}} = 0.03$  eV,  $\lambda_{\text{in}} = \lambda_{\text{R}} = 0$ . (c) Hopping integral, magnetic exchange, and intrinsic SOC.  $t = 0.91$  eV,  $M_{\text{ex}} = 0.03$  eV,  $\lambda_{\text{in}} = 0.016$  eV,  $\lambda_{\text{R}} = 0$ . (d) Hopping integral, magnetic exchange, intrinsic and Rashba SOC.  $t = 0.91$  eV,  $M_{\text{ex}} = 0.03$  eV,  $\lambda_{\text{in}} = 0.016$  eV,  $\lambda_{\text{R}} = 0.027$  eV. Different colors in (b)-(d) represent  $\langle \hat{s}_z \rangle$ . (e) In-plane spin texture of four bands. We observe that the spin textures at the K (and  $-K$ ) calculated from the tight binding model have similar behavior with those calculated from DFT, validating our tight binding model.

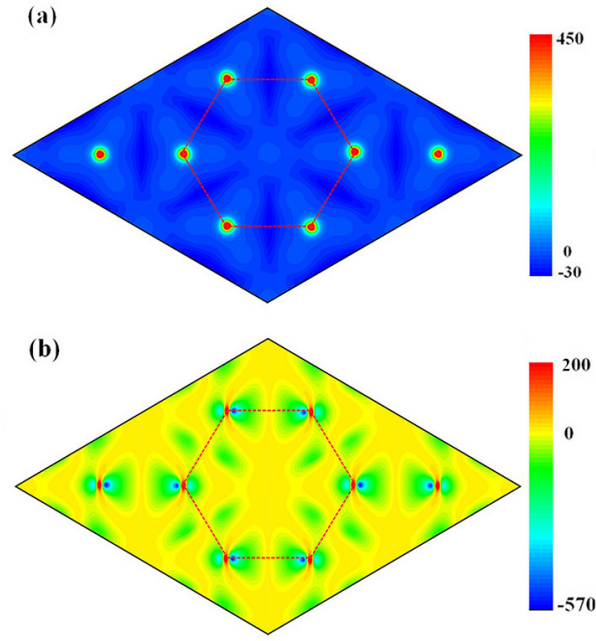

**Figure S5.** (a) Berry curvature and (b) spin Berry curvature between CB and CB+1 [denoted as  $\Omega_{\text{CB}}(\mathbf{k})$  and  $\Omega^{\text{s}}_{\text{CB}}(\mathbf{k})$ ] of  $h\text{-Sb@MnO}_2\text{-4H}$ .

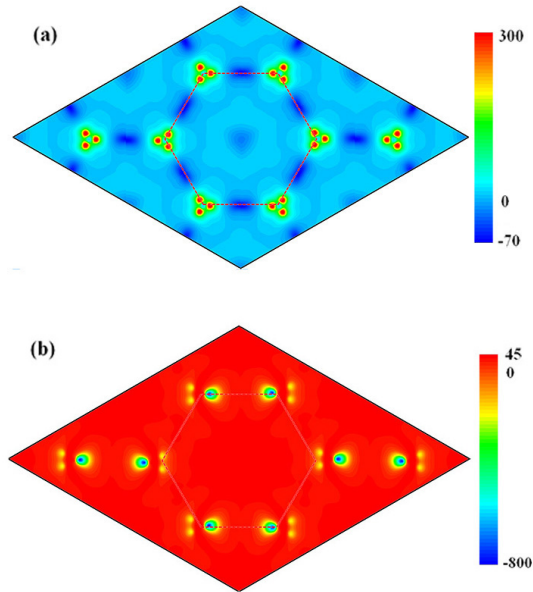

**Figure S6.** (a)  $\Omega_{\text{CB}}(\mathbf{k})$  and (b)  $\Omega^{\text{s}}_{\text{CB}}(\mathbf{k})$  of  $h\text{-Bi@MnO}_2\text{-4H}$ .
